# Supplementary material
Source: Springer Nature journal article supplement (https://www.springermedizin.de/resource/supplementary/12959_2010_140_MOESM7_ESM.pdf/9569698)

**A.**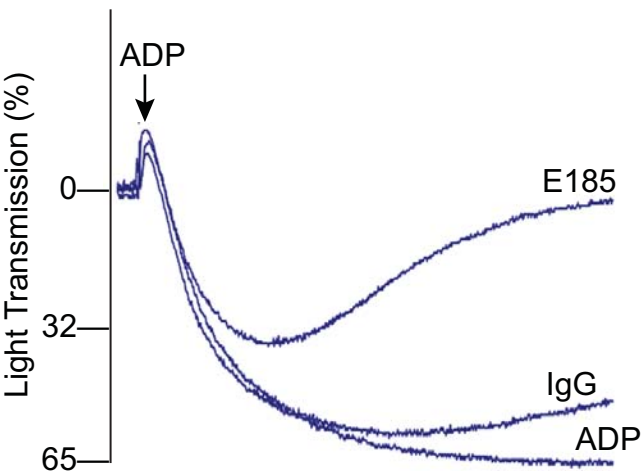**B.**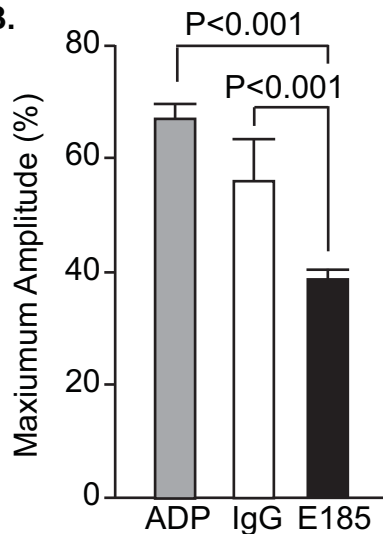**C.**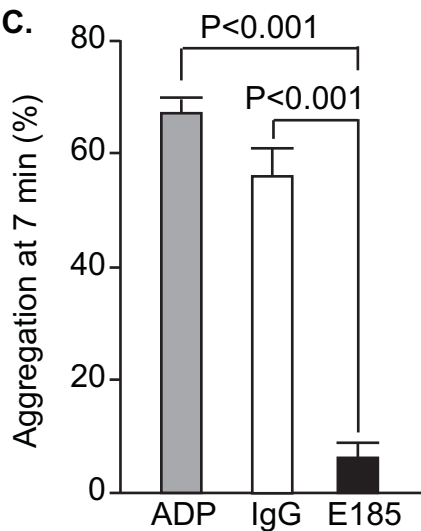**D.**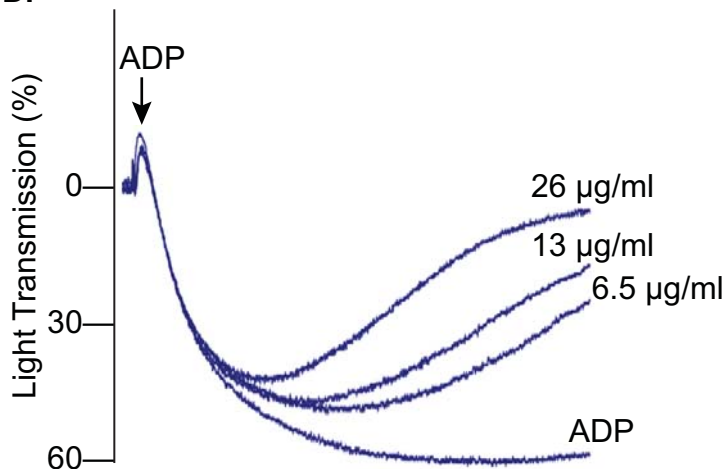

Supplement: MOESM7 [file 9569698]
